# Supplementary material for: Assembly of Cd(ii) coordination polymers: structural variation, supramolecular isomers, and temperature/anion-induced solvent-mediated structural transformations
Source: Royal Society of Chemistry journal article supplement (doi:10.1039/c4ce01779j), 2014-10-13
Supplement: c4ce01779j1.pdf [file c4ce01779j1.pdf]

# Assembly of Cd(II) Coordination Polymers: Structural Variation, Supramolecular Isomers, and Temperature/Anion-induced Solvent-mediated Structural Transformations

Shuang-Shuang Hou,<sup>†</sup> Xuan Huang,<sup>†</sup> Jun-Gu Guo, Sheng-Run Zheng,<sup>\* †</sup> Jing Lei,<sup>†</sup> Jing-Bo Tan, Jun Fan,<sup>†</sup> Wei-Guang Zhang<sup>\*†</sup>

<sup>†</sup>School of Chemistry and Environment, South China Normal University, Guangzhou, 510006, China

## Supporting information

Table S1 Selected bond lengths [Å] and angles[°] for the complexes.<sup>a</sup>

| Complex 1            |            |                     |           |
|----------------------|------------|---------------------|-----------|
| Cd(1)-N(6)#1         | 2.284(6)   | Cd(1)-N(4)          | 2.406(7)  |
| Cd(1)-N(6)#2         | 2.284(6)   | Cd(1)-O(1)#3        | 2.413(6)  |
| Cd(1)-N(4)#3         | 2.406(7)   | Cd(1)-O(1)          | 2.413(6)  |
| N(6)#1-Cd(1)-N(6)#2  | 92.0(2)    | N(4)#3-Cd(1)-O(1)#3 | 81.4(2)   |
| N(6)#1-Cd(1)-N(4)#3  | 88.0(2)    | N(4)-Cd(1)-O(1)#3   | 89.4(2)   |
| N(6)#2-Cd(1)-N(4)#3  | 88.0(2)    | N(6)#1-Cd(1)-O(1)   | 90.6(2)   |
| N(6)#1-Cd(1)-N(4)    | 92.0(2)    | N(6)#2-Cd(1)-O(1)   | 81.4(2)   |
| N(6)#2-Cd(1)-N(4)    | 180.000(1) | N(4)#3-Cd(1)-O(1)   | 98.6(2)   |
| N(4)#3-Cd(1)-N(4)    | 90.6(2)    | N(4)-Cd(1)-O(1)     | 180.0(3)  |
| N(6)#1-Cd(1)-O(1)#3  | 89.4(2)    | O(1)#3-Cd(1)-O(1)   | 121.6     |
| N(6)#2-Cd(1)-O(1)#3  | 98.6(2)    |                     |           |
| Complex 2            |            |                     |           |
| Cd(1)-N(6)#1         | 2.275(10)  | Cd(1)-N(4)          | 2.367(10) |
| Cd(1)-N(12)#2        | 2.286(11)  | Cd(1)-O(2W)         | 2.355(9)  |
| Cd(1)-N(7)           | 2.348(10)  | Cd(1)-O(1W)         | 2.513(9)  |
| N(6)#1-Cd(1)-N(12)#2 | 165.6(4)   | N(7)-Cd(1)-O(2W)    | 165.1(4)  |
| N(6)#1-Cd(1)-N(7)    | 92.9(4)    | N(4)-Cd(1)-O(2W)    | 93.7(3)   |
| N(12)#2-Cd(1)-N(7)   | 97.3(4)    | N(6)#1-Cd(1)-O(1W)  | 84.4(3)   |
| N(6)#1-Cd(1)-N(4)    | 97.0(3)    | N(12)#2-Cd(1)-O(1W) | 86.1(3)   |
| N(12)#2-Cd(1)-N(4)   | 91.1(4)    | N(7)-Cd(1)-O(1W)    | 87.1(3)   |
| N(7)-Cd(1)-N(4)      | 100.3(3)   | N(4)-Cd(1)-O(1W)    | 172.3(3)  |
| N(6)#1-Cd(1)-O(2W)   | 80.3(3)    | O(2W)-Cd(1)-O(1W)   | 79.0(3)   |
| N(12)#2-Cd(1)-O(2W)  | 87.3(4)    |                     |           |

---

**Complex 3**

---

|                      |            |                      |            |
|----------------------|------------|----------------------|------------|
| Cd(1)-N(6)           | 2.272(10)  | Cd(1)-N(6)           | 2.272(10)  |
| Cd(1)-N(6)#1         | 2.272(10)  | Cd(1)-N(6)#1         | 2.272(10)  |
| Cd(1)-O(1W)          | 2.343(11)  | Cd(1)-O(1W)          | 2.343(11)  |
| N(6)-Cd(1)-N(6)#1    | 180.000(1) | O(1W)-Cd(1)-N(2)#2   | 91.3(4)    |
| N(6)-Cd(1)-O(1W)     | 84.0(4)    | O(1W)#1-Cd(1)-N(2)#2 | 88.7(4)    |
| N(6)#1-Cd(1)-O(1W)   | 96.0(4)    | N(6)-Cd(1)-N(2)#3    | 91.7(4)    |
| N(6)-Cd(1)-O(1W)#1   | 96.0(4)    | N(6)#1-Cd(1)-N(2)#3  | 88.3(4)    |
| N(6)#1-Cd(1)-O(1W)#1 | 84.0(4)    | O(1W)-Cd(1)-N(2)#3   | 88.7(4)    |
| O(1W)-Cd(1)-O(1W)#1  | 180.000(1) | O(1W)#1-Cd(1)-N(2)#3 | 91.3(4)    |
| N(6)-Cd(1)-N(2)#2    | 88.3(4)    | N(2)#2-Cd(1)-N(2)#3  | 180.000(1) |
| N(6)#1-Cd(1)-N(2)#2  | 91.7(4)    |                      |            |

---

**Complex 4**

---

|                     |            |                     |            |
|---------------------|------------|---------------------|------------|
| Cd(1)-N(1)          | 2.264(5)   | Cd(1)-O(1W)#1       | 2.498(4)   |
| Cd(1)-N(4)          | 2.358(5)   | Cd(1)-Cl(1)         | 2.5490(16) |
| Cd(1)-O(1W)         | 2.464(5)   | Cd(1)-Cl(1)#1       | 2.6396(17) |
| N(1)-Cd(1)-N(4)     | 92.70(17)  | O(1W)-Cd(1)-Cl(1)   | 79.81(11)  |
| N(1)-Cd(1)-O(1W)    | 90.46(16)  | O(1W)#1-Cd(1)-Cl(1) | 95.58(11)  |
| N(4)-Cd(1)-O(1W)    | 85.03(17)  | N(1)-Cd(1)-Cl(1)#1  | 92.38(13)  |
| N(1)-Cd(1)-O(1W)#1  | 161.58(17) | N(4)-Cd(1)-Cl(1)#1  | 102.51(14) |
| N(4)-Cd(1)-O(1W)#1  | 74.91(16)  | O(1W)-Cd(1)-Cl(1)#1 | 171.80(11) |
| O(1W)-Cd(1)-O(1W)#1 | 101.74(14) | O(1W)#1-Cd(1)-Cl(1) | 77.47(11)  |
| N(1)-Cd(1)-Cl(1)    | 100.17(13) | Cl(1)-Cd(1)-Cl(1)#1 | 92.11(5)   |
| N(4)-Cd(1)-Cl(1)    | 160.12(13) |                     |            |

---

**Complex 5**

---

|                     |            |                      |           |
|---------------------|------------|----------------------|-----------|
| Cd(1)-N(6)          | 2.2325(19) | Cd(1)-Cl(1)          | 2.4492(6) |
| Cd(1)-N(1)#1        | 2.2522(18) | Cd(1)-Cl(1)#3        | 2.9105(7) |
| Cd(1)-N(4)#2        | 2.3565(19) |                      |           |
| N(6)-Cd(1)-N(1)#1   | 132.40(7)  | N(4)#2-Cd(1)-Cl(1)   | 114.89(5) |
| N(6)-Cd(1)-N(4)#2   | 95.56(7)   | N(6)-Cd(1)-Cl(1)#3   | 84.78(5)  |
| N(1)#1-Cd(1)-N(4)#2 | 82.07(7)   | N(1)#1-Cd(1)-Cl(1)#3 | 80.82(5)  |
| N(6)-Cd(1)-Cl(1)    | 110.51(5)  | N(4)#2-Cd(1)-Cl(1)#3 | 156.94(5) |
| N(1)#1-Cd(1)-Cl(1)  | 113.45(5)  | Cl(1)-Cd(1)-Cl(1)#3  | 86.20(2)  |

---

**Complex 6**

---

|                     |            |                     |            |
|---------------------|------------|---------------------|------------|
| Cd(1)-N(6)#1        | 2.308(10)  | Cd(1)-I(1)          | 3.0146(15) |
| Cd(1)-N(6)          | 2.308(10)  | Cd(1)-I(1)#2        | 3.0530(16) |
| Cd(1)-I(1)#1        | 3.0146(15) | Cd(1)-I(1)#3        | 3.0530(16) |
| N(6)#1-Cd(1)-N(6)   | 180.0(6)   | I(1)#1-Cd(1)-I(1)#2 | 90.60(5)   |
| N(6)#1-Cd(1)-I(1)#1 | 90.8(3)    | I(1)-Cd(1)-I(1)#2   | 89.40(5)   |
| N(6)-Cd(1)-I(1)#1   | 89.2(3)    | N(6)#1-Cd(1)-I(1)#3 | 90.0(3)    |
| N(6)#1-Cd(1)-I(1)   | 89.2(3)    | N(6)-Cd(1)-I(1)#3   | 90.0(3)    |
| N(6)-Cd(1)-I(1)     | 90.8(3)    | I(1)#1-Cd(1)-I(1)#3 | 89.40(5)   |

|                     |           |                     |           |
|---------------------|-----------|---------------------|-----------|
| I(1)#1-Cd(1)-I(1)   | 180.00(4) | I(1)-Cd(1)-I(1)#3   | 90.60(5)  |
| N(6)#1-Cd(1)-I(1)#2 | 90.0(3)   | I(1)#2-Cd(1)-I(1)#3 | 180.00(4) |
| N(6)-Cd(1)-I(1)#2   | 90.0(3)   | N(3)#2-Zn(2)-O(1)#4 | 94.4(3)   |

---

**Complex 7**

|                     |            |                   |           |
|---------------------|------------|-------------------|-----------|
| I(1)-Cd(1)          | 2.6901(4)  | Cd(1)-N(1)#1      | 2.237(3)  |
| Cd(1)-N(6)          | 2.222(3)   | Cd(1)-N(4)#2      | 2.294(3)  |
| N(6)-Cd(1)-N(1)#1   | 122.19(10) | N(6)-Cd(1)-I(1)   | 107.58(7) |
| N(6)-Cd(1)-N(4)#2   | 101.64(9)  | N(1)#1-Cd(1)-I(1) | 117.43(6) |
| N(1)#1-Cd(1)-N(4)#2 | 85.34(9)   | N(4)#2-Cd(1)-I(1) | 120.74(7) |

---

**Complex 8**

|                     |            |                      |            |
|---------------------|------------|----------------------|------------|
| Cd(1)-N(2)          | 2.3466(16) | Cd(2)-N(6)#6         | 2.2940(17) |
| Cd(1)-N(2)#1        | 2.3466(16) | Cd(2)-N(6)#7         | 2.2940(17) |
| Cd(1)-N(2)#2        | 2.3466(16) | Cd(2)-N(6)           | 2.2940(17) |
| Cd(1)-N(2)#3        | 2.3466(16) | Cd(2)-N(3)#8         | 2.3266(17) |
| Cd(1)-N(2)#4        | 2.3466(16) | Cd(2)-N(3)#9         | 2.3267(17) |
| Cd(1)-N(2)#5        | 2.3466(16) | Cd(2)-N(3)#10        | 2.3267(17) |
| N(2)-Cd(1)-N(2)#1   | 88.06(6)   | N(6)#6-Cd(2)-N(6)#7  | 90.98(7)   |
| N(2)-Cd(1)-N(2)#2   | 180.00(11) | N(6)#6-Cd(2)-N(6)    | 90.98(7)   |
| N(2)#1-Cd(1)-N(2)#2 | 91.94(6)   | N(6)#7-Cd(2)-N(6)    | 90.98(7)   |
| N(2)-Cd(1)-N(2)#3   | 88.06(6)   | N(6)#6-Cd(2)-N(3)#8  | 95.17(6)   |
| N(2)#1-Cd(1)-N(2)#3 | 88.06(6)   | N(6)#7-Cd(2)-N(3)#8  | 86.56(7)   |
| N(2)#2-Cd(1)-N(2)#3 | 91.94(6)   | N(6)-Cd(2)-N(3)#8    | 173.41(6)  |
| N(2)-Cd(1)-N(2)#4   | 91.94(6)   | N(6)#6-Cd(2)-N(3)#9  | 86.56(7)   |
| N(2)#1-Cd(1)-N(2)#4 | 91.94(6)   | N(6)#7-Cd(2)-N(3)#9  | 173.41(6)  |
| N(2)#2-Cd(1)-N(2)#4 | 88.06(6)   | N(6)-Cd(2)-N(3)#9    | 95.17(6)   |
| N(2)#3-Cd(1)-N(2)#4 | 180        | N(3)#8-Cd(2)-N(3)#9  | 87.57(6)   |
| N(2)-Cd(1)-N(2)#5   | 91.94(6)   | N(6)#6-Cd(2)-N(3)#10 | 173.41(6)  |
| N(2)#1-Cd(1)-N(2)#5 | 180.00(5)  | N(6)#7-Cd(2)-N(3)#10 | 95.17(6)   |
| N(2)#2-Cd(1)-N(2)#5 | 88.06(6)   | N(6)-Cd(2)-N(3)#10   | 86.56(7)   |
| N(2)#3-Cd(1)-N(2)#5 | 91.94(6)   | N(3)#8-Cd(2)-N(3)#10 | 87.57(6)   |
| N(2)#4-Cd(1)-N(2)#5 | 88.06(6)   | N(3)#9-Cd(2)-N(3)#10 | 87.57(6)   |

---

\*Symmetry transformations used to generate equivalent atoms: #1  $-x + 1, -y + 1, -z + 1$ , #2  $x - 1, y + 1, z - 1$ , #3  $-x, -y + 2, -z$ , #4  $x + 1, y - 1, z + 1$  for complex **1**; #1  $x, y + 1, z$ , #2  $x, -y + 3/2, z + 1/2$ , #3  $x, y - 1, z$ , #4  $x, -y + 3/2, z - 1/2$  for complex **2**; #1  $-x, -y, -z + 1$ , #2  $-x + 1/2, y - 1/2, -z + 3/2$ , #3  $x - 1/2, -y + 1/2, z - 1/2$ , #4  $-x + 1/2, y + 1/2, -z + 3/2$  for complex **3**; #1  $x, -y + 1/2, z - 1/2$ , #2  $x, -y + 1/2, z + 1/2$ , #3  $-x + 2, y + 1/2, -z + 3/2$ , #4  $-x + 2, y - 1/2, -z + 3/2$  for complex **4**; #1  $-x + 1, -y, -z$ , #2  $x - 1, -y + 1/2, z - 1/2$ , #3  $-x, -y, -z$ , #4  $x + 1, -y + 1/2, z + 1/2$  for complex **5**; #1  $-x, -y, -z$ , #2  $x - 1, y, z$ , #3  $-x + 1, -y, -z$ , #4  $x + 1, y, z$  for complex **6**. #1  $-x + 1, -y, -z$ , #2  $x - 1, -y + 1/2, z - 1/2$ , #3  $x + 1, -y + 1/2, z + 1/2$  for complex **7**, #1  $-x + y, -x, z$ , #2  $-x, -y, -z$ , #3  $-y, x - y, z$ , #4  $y, -x + y, -z$ , #5  $x - y, x, -z$ , #6  $-y + 1, x - y + 1, z$ , #7  $-x + y, -x + 1, z$ , #8  $-y + 1/3, x - y + 2/3, z - 1/3$ , #9  $x + 1/3, y + 2/3, z - 1/3$ , #10  $-x + y + 1/3, -x + 2/3, z - 1/3$ , #11  $x - 1/3, y - 2/3, z + 1/3$  for complex **8**.

---

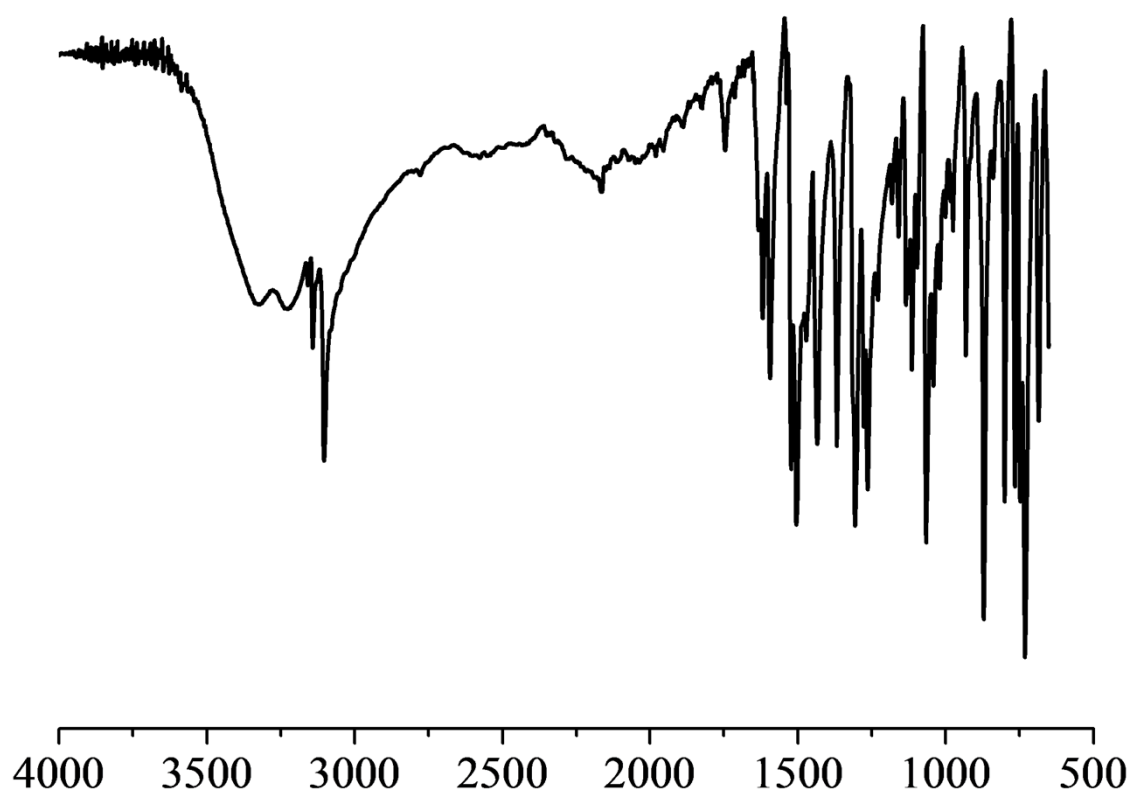

**Figure S1.** The IR spectrum of compound 1.

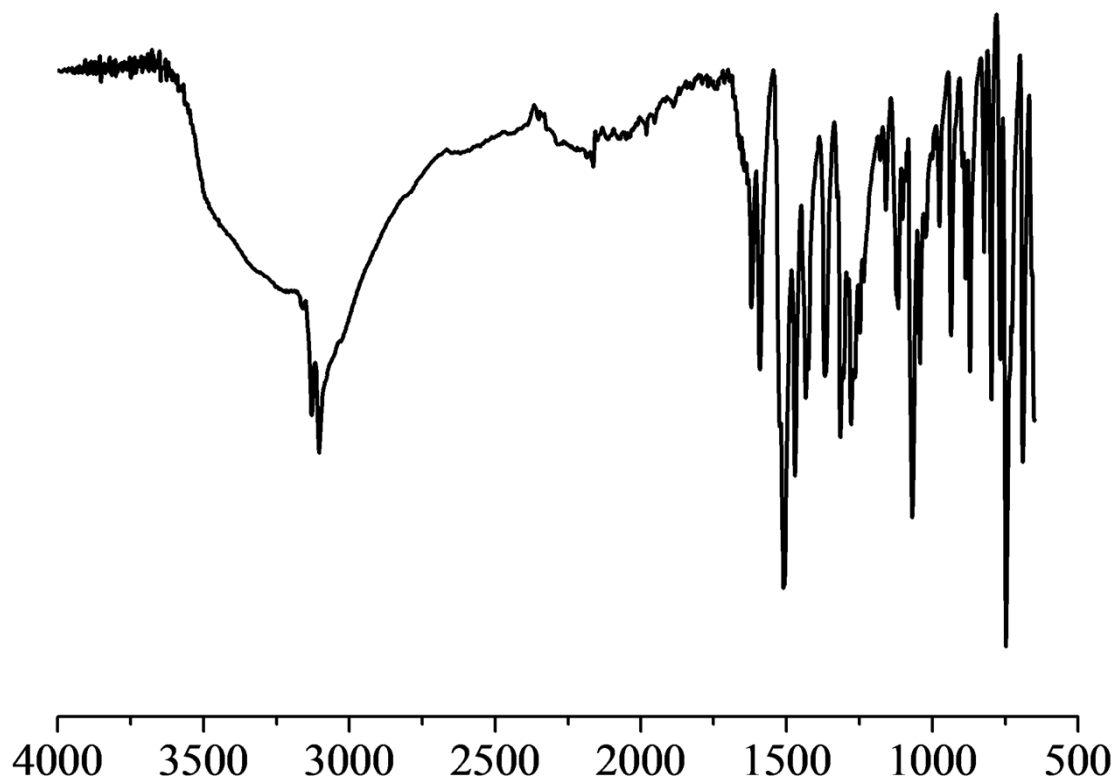

**Figure S2.** The IR spectrum of compound 2.

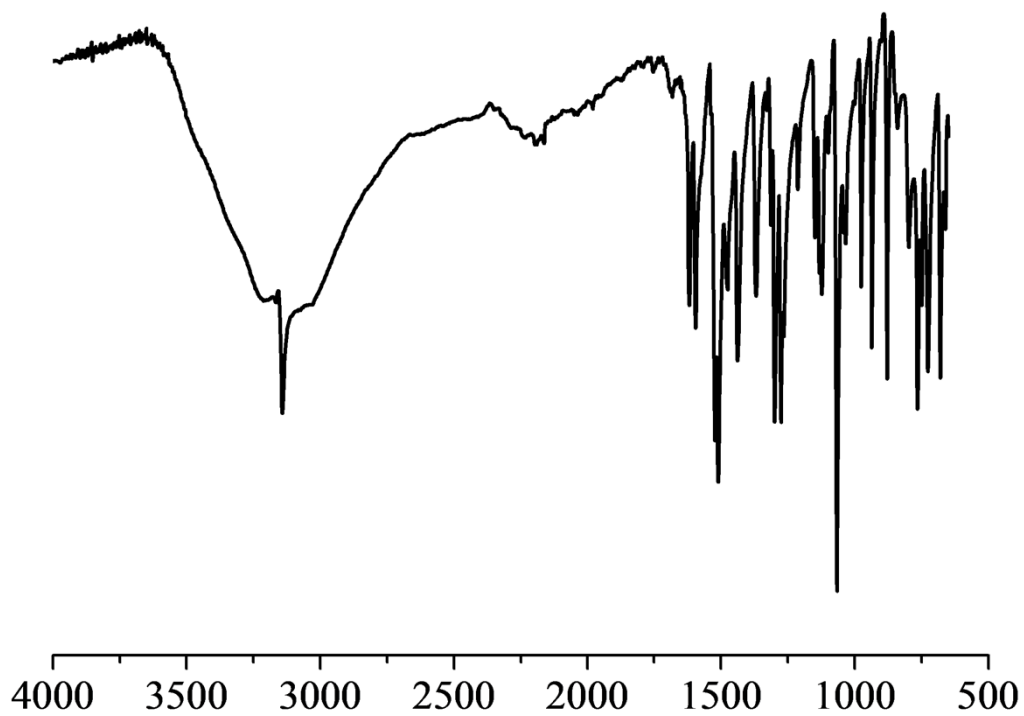

**Figure S3.** The IR spectrum of compound 3.

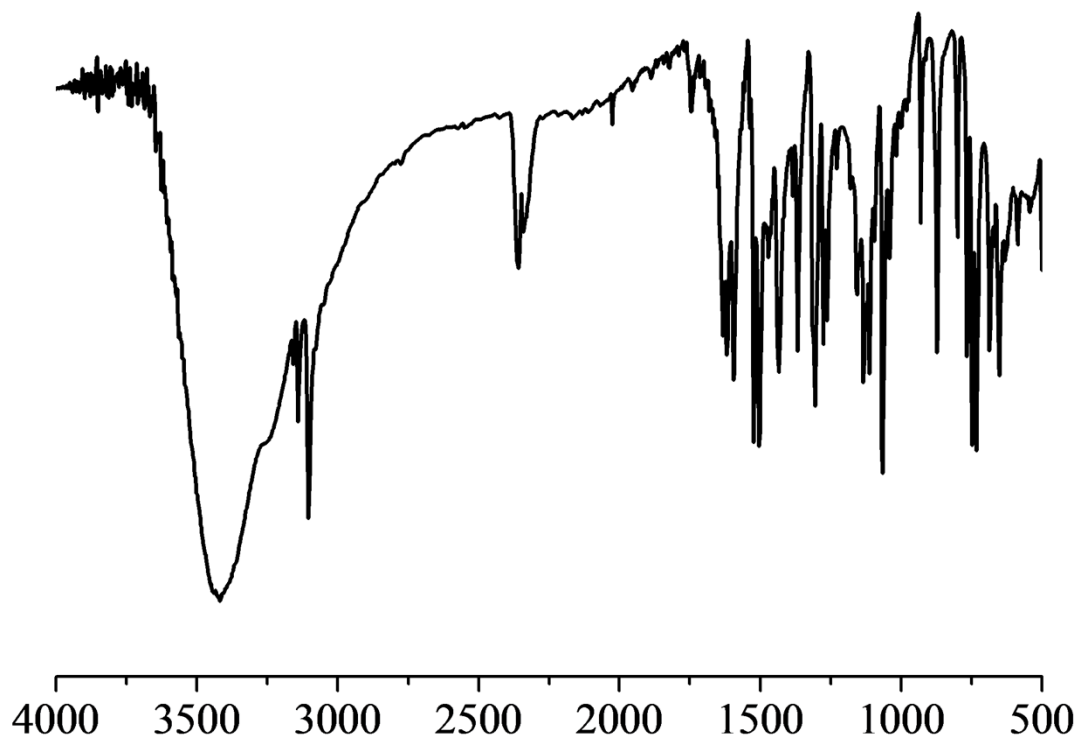

**Figure S4.** The IR spectrum of compound 4.

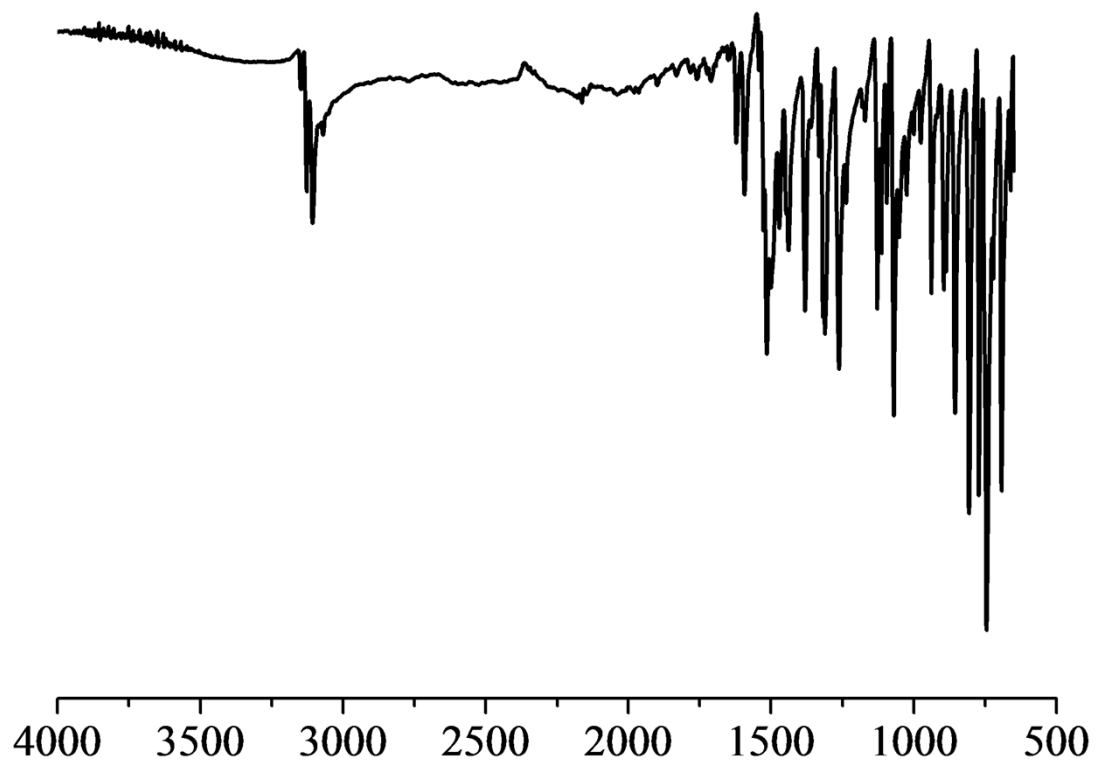

**Figure S5.** The IR spectrum of compound 5.

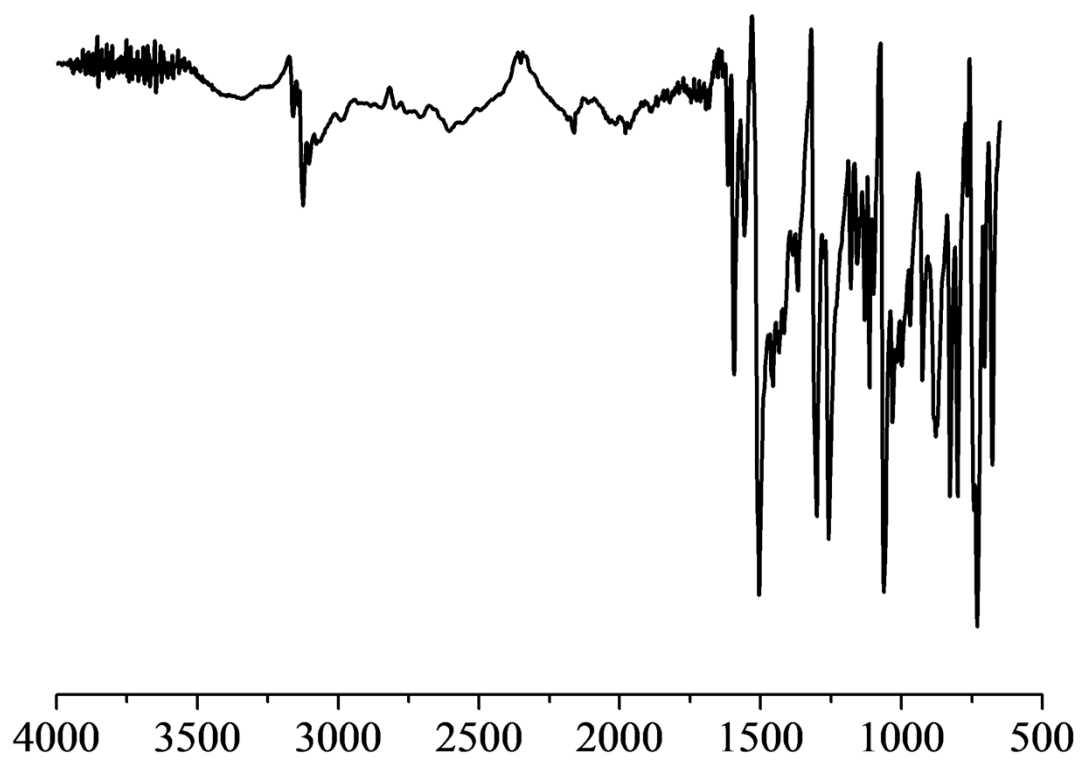

**Figure S6.** The IR spectrum of compound 6.

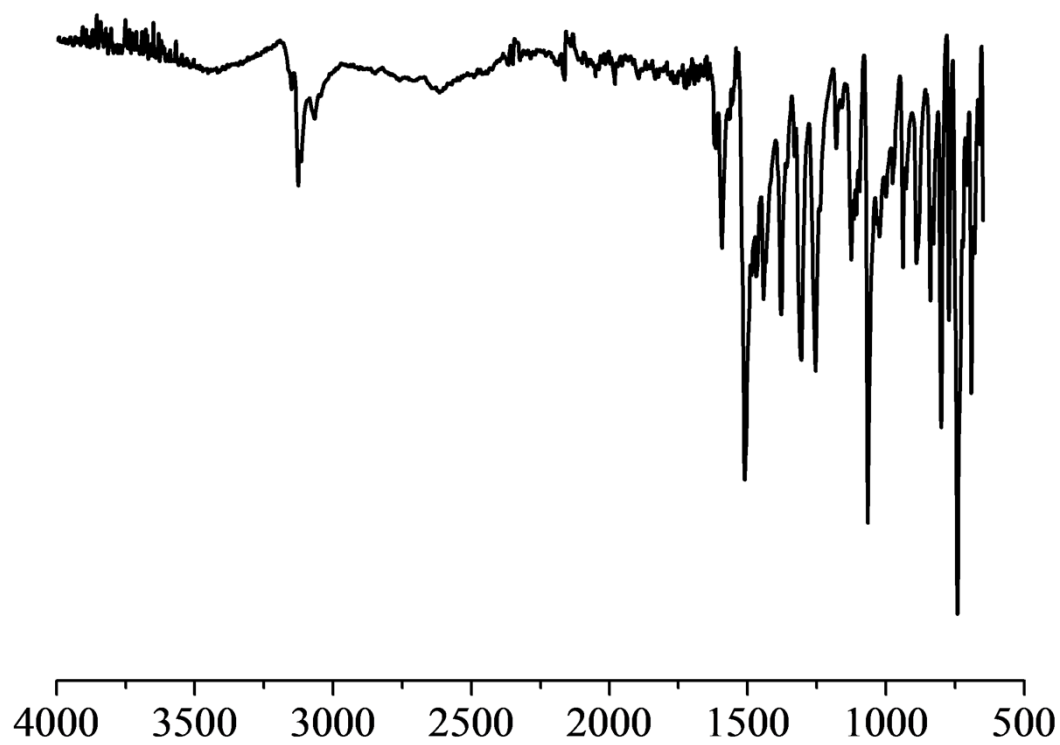

**Figure S7.** The IR spectrum of compound 7.

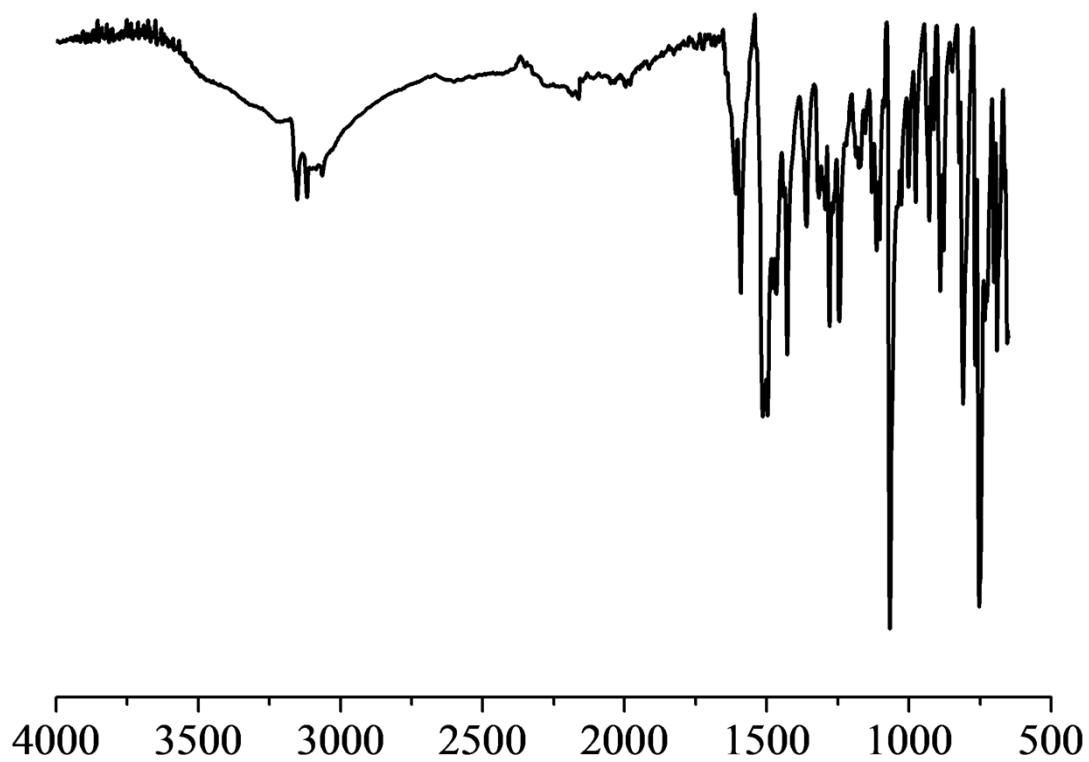

**Figure S8.** The IR spectrum of compound 8.

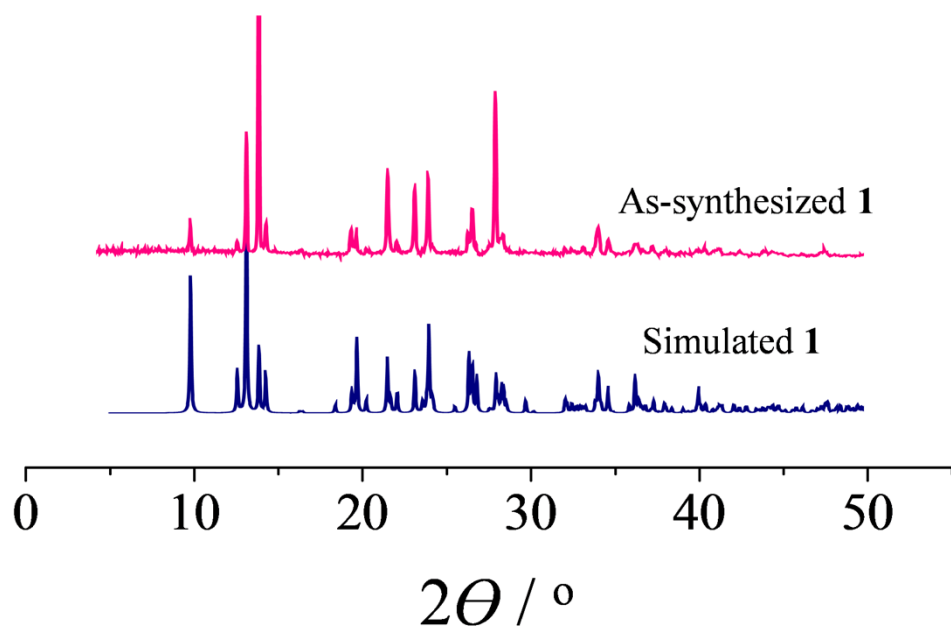

**Figure S9.** Powder X-ray diffraction patterns of as-synthesized **1** and simulated **1**.

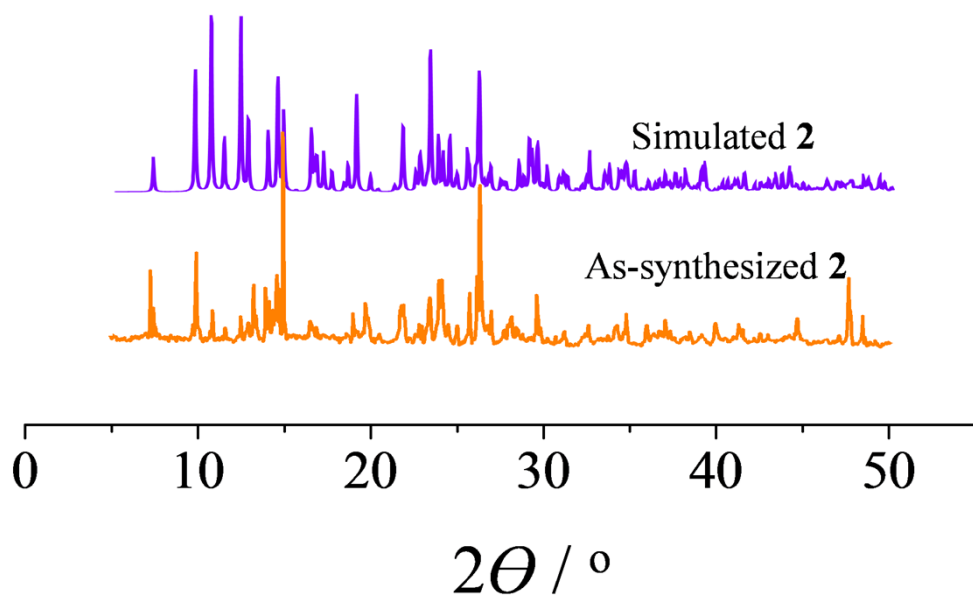

**Figure S10.** Powder X-ray diffraction patterns of as-synthesized **2** and simulated **2**.



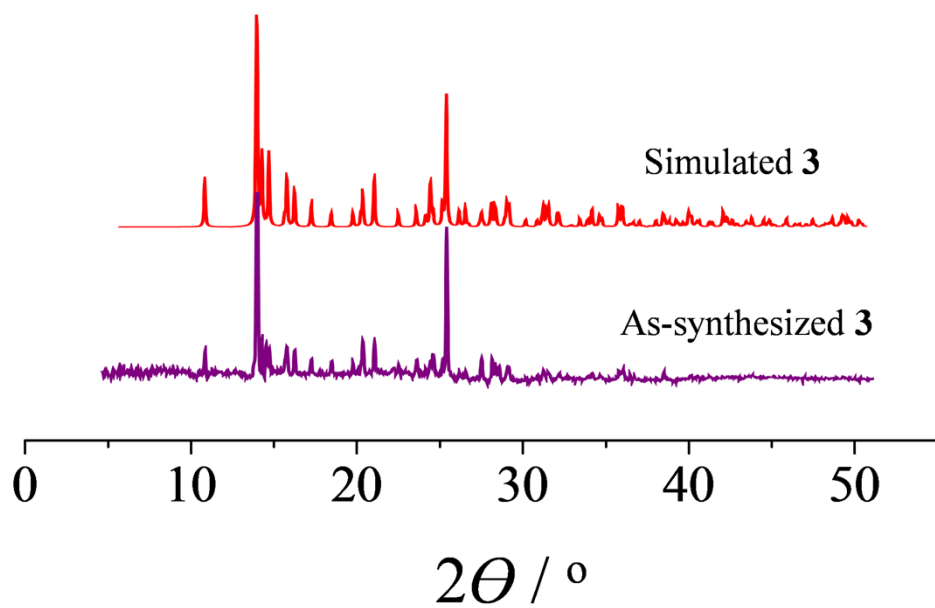

**Figure S11.** Powder X-ray diffraction patterns of as-synthesized **3** and simulated **3**.

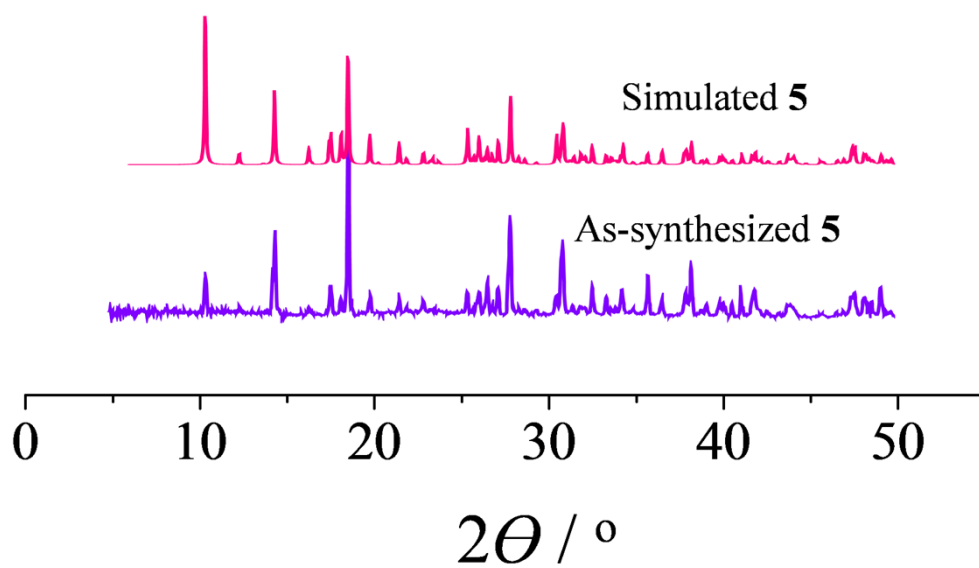

**Figure S12.** Powder X-ray diffraction patterns of as-synthesized **5** and simulated **5**.

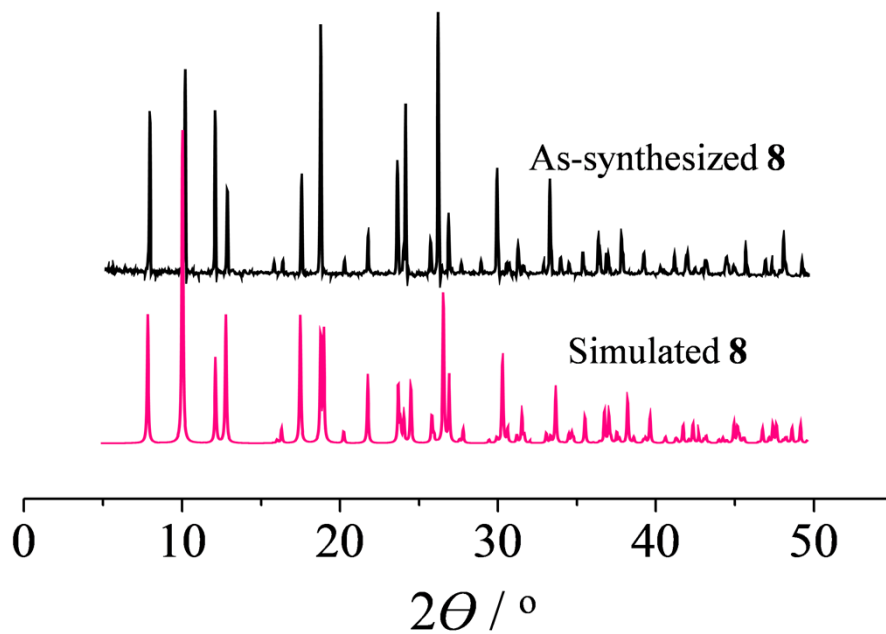

**Figure S13.** Powder X-ray diffraction patterns of as-synthesized **5** and simulated **5**.

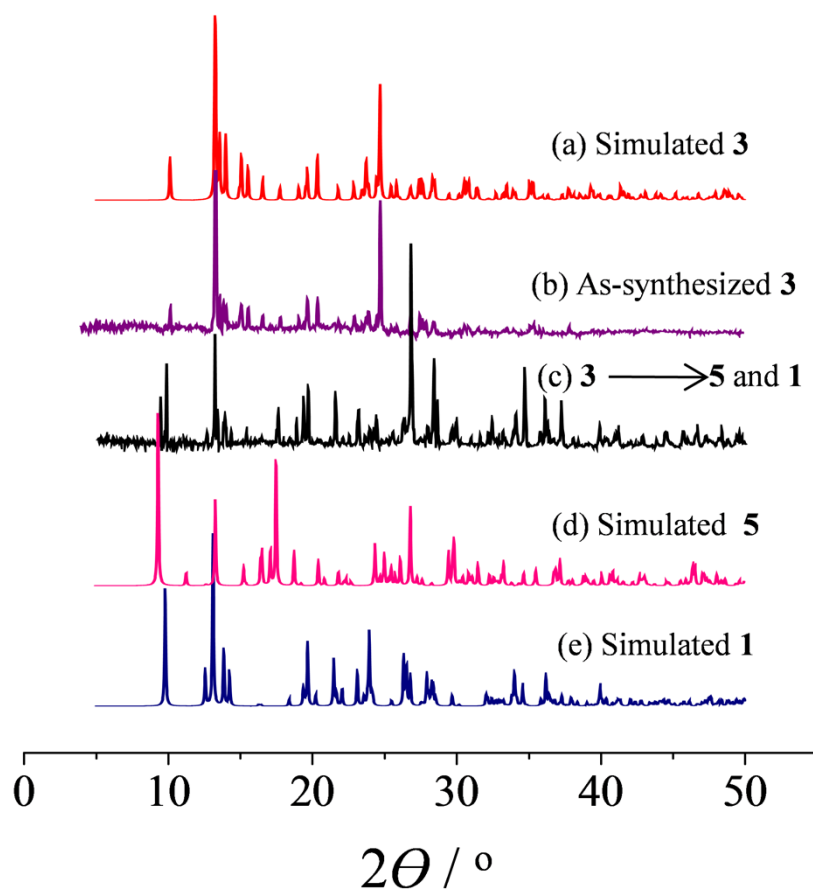

**Figure S14.** Powder X-ray diffraction patterns of (a) simulated **3**. (b) as-synthesized **3**. (c) after the reaction of **3** in NaCl solution at 170 °C. (d) simulated **5**. (e) simulated **1**.

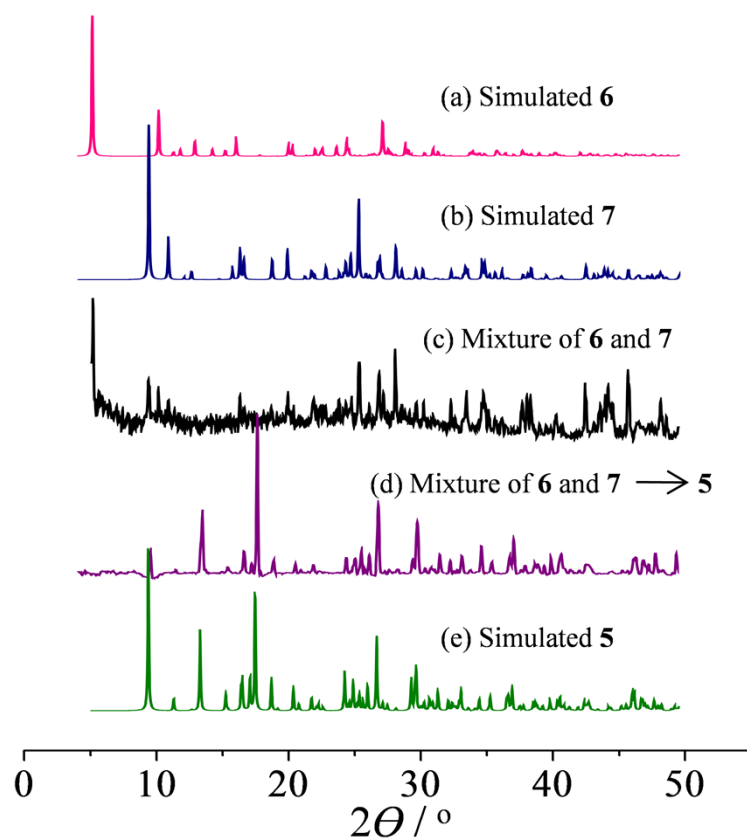

**Figure S15.** Powder X-ray diffraction patterns of (a) simulated **6**. (b) simulated **7**. (c) as-synthesized mixture of **6** and **7**. (d) after the reaction of mixture of **6** and **7** in NaCl solution at 170 °C. (e) simulated **5**.

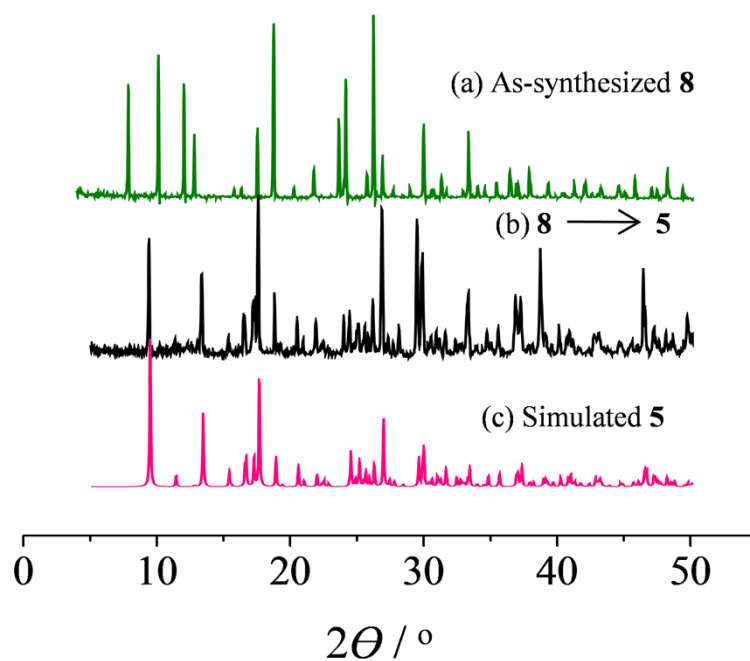

**Figure S16.** Powder X-ray diffraction patterns of (a) as-synthesized **8**. (d) after the reaction of **8** in NaCl solution at 170 °C. (e) simulated **5**.

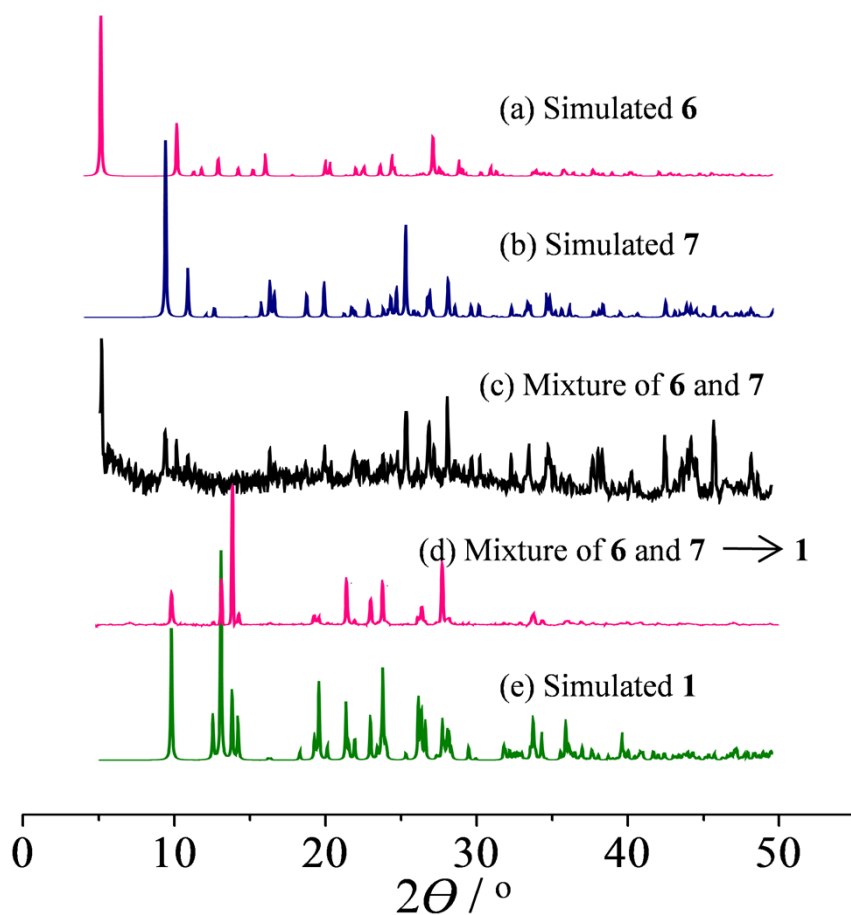

**Figure S17.** Powder X-ray diffraction patterns of (a) simulated **6**. (b) simulated **7**. (c) as-synthesized mixture of **6** and **7**. (d) after the reaction of mixture of **6** and **7** in water at 170 °C. (e) simulated **1**.

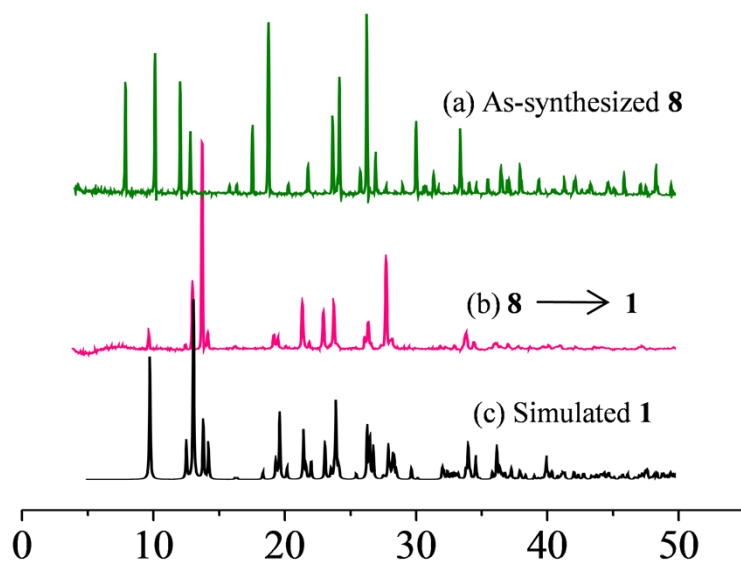

**Figure S18.** Powder X-ray diffraction patterns of (a) as-synthesized **8**. (d) after the reaction of **8** in water at 170 °C. (e) simulated **1**.

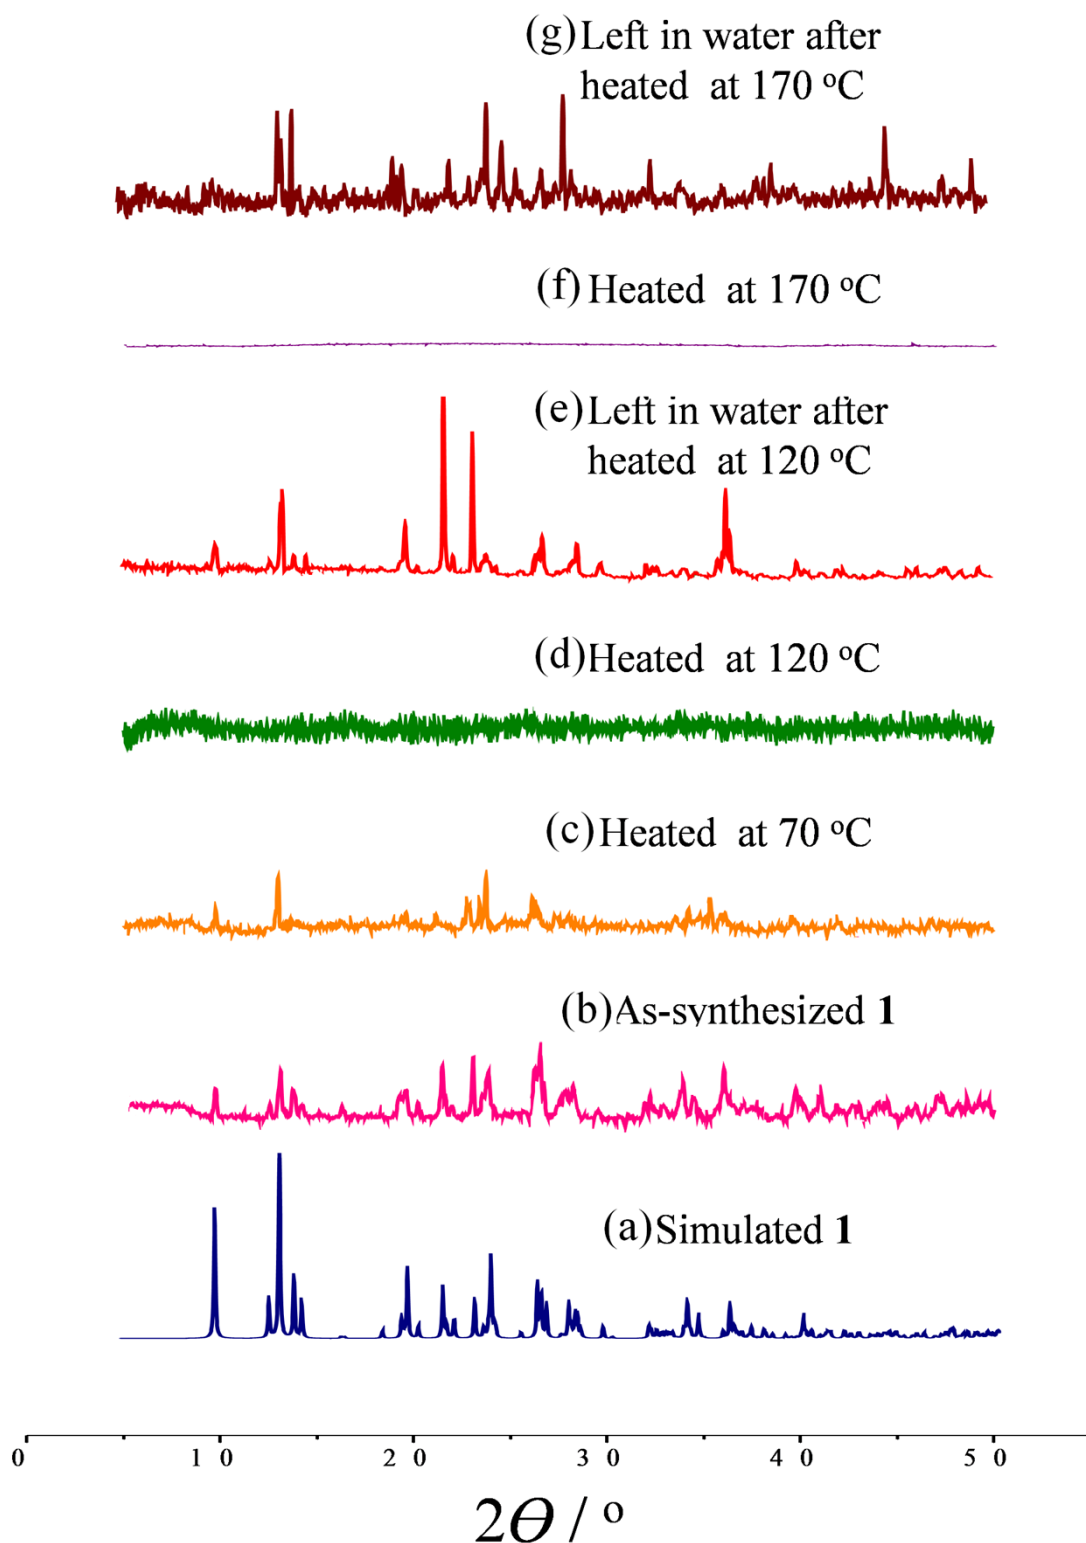

**Figure S19.** Powder X-ray diffraction patterns of (a) simulated **1**. (b) as-synthesized **1**. (c) heated of **1** at 70 °C. (d) heated of **1** at 120 °C. (e) left in water after heated at 120 °C. (f) heated of **1** at 170 °C. (g) left in water after heated at 170 °C.

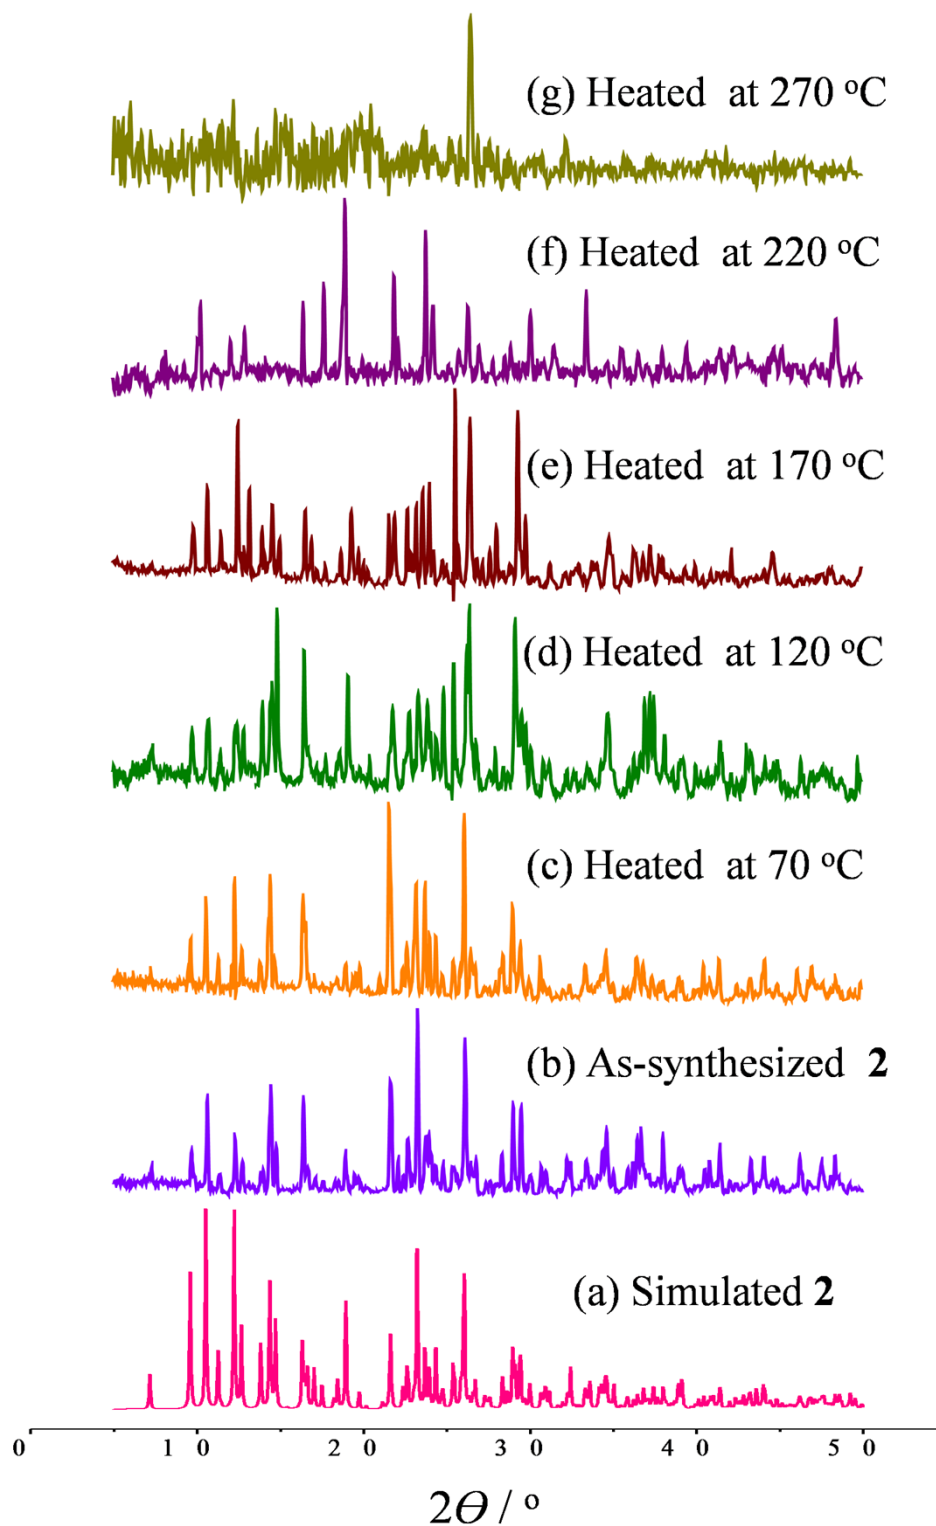

**Figure S20.** Powder X-ray diffraction patterns of (a) simulated **2**. (b) as-synthesized **2**. (c) heated of **2** at 70 °C. (d) heated of **2** at 120 °C. (e) heated of **2** at 170 °C. (f) heated of **1** at 220 °C. (g) heated of **1** at 270 °C.

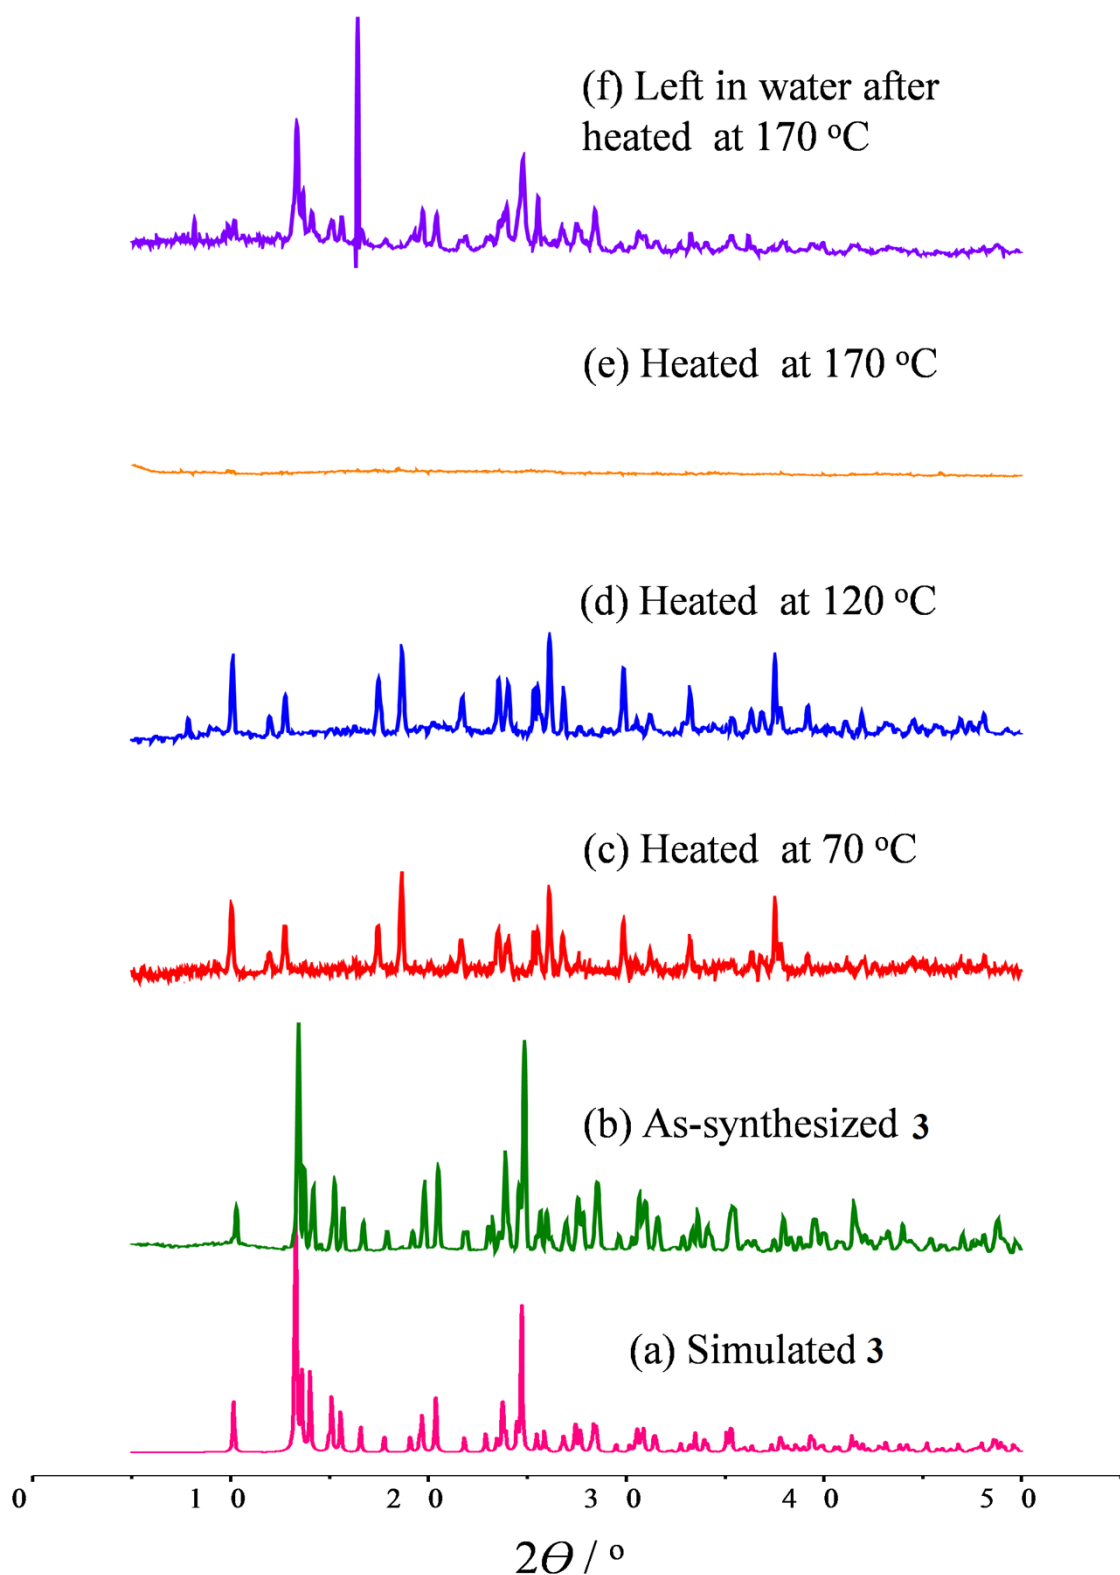

**Figure S21.** Powder X-ray diffraction patterns of (a) simulated **3**. (b) as-synthesized **3**. (c) heated of **3** at 70 °C. (d) heated of **3** at 120 °C. (e) heated of **1** at 170 °C. (f) left in water after heated at 170 °C.
